# Supplementary material for: Genome-Wide SNP Markers for Genotypic and Phenotypic Differentiation of Melon (Cucumis melo L.) Varieties Using Genotyping-by-Sequencing
Source: MDPI journal article supplement (doi:10.3390/ijms22136722), 2021-06-23
Supplement: s1 [file s1]

**Table S4.** Statistics of genetic variation for the makuwa cultivars and landraces

| Variety   | N      | Na    | Ne    | I     | He    | uHe   | %P     |
|-----------|--------|-------|-------|-------|-------|-------|--------|
| Cultivars | 21.000 | 0.897 | 1.111 | 0.113 | 0.070 | 0.072 | 33.55% |
| Landraces | 26.000 | 0.700 | 1.105 | 0.100 | 0.064 | 0.066 | 23.62% |

N, number of individuals; Na, number of alleles; Ne, number of effective alleles; I, Information index; He, expected heterozygosity; uHe, unbiased expected heterozygosity; %P, percentage of polymorphic loci

**Table S5.** Results of analysis of molecular variance (AMOVA) and F-statistics within the makuwa cultivars and landraces

| SV          | df | SS       | MS      | Est. Var. | %    | PhiPT |
|-------------|----|----------|---------|-----------|------|-------|
| Among Pops  | 1  | 493.162  | 493.162 | 13.791    | 7%   | 0.074 |
| Within Pops | 45 | 7773.647 | 172.748 | 172.748   | 93%  |       |
| Total       | 46 | 8266.809 |         | 186.538   | 100% |       |

SV, Source of variation; df, degrees of freedom; SS, sum of squares; MS, mean square; Est. Var., Estimated variance; %, Percentage of variation.

**Table S6.** Pairwise distance between single nucleotide polymorphisms (SNPs).

| Varieties                                | <i>C. melo</i> L. var. <i>makuwa</i> |                   | <i>C. melo</i> subsp. <i>melo</i> |                   |
|------------------------------------------|--------------------------------------|-------------------|-----------------------------------|-------------------|
|                                          | Non-matching nucleotides             | Pairwise distance | Non-matching nucleotides          | Pairwise distance |
| <i>C. melo</i> L. var. <i>makuwa</i>     | 0                                    | 0.00%             | 52                                | 100.00%           |
| <i>C. melo</i> subsp. <i>melo</i>        | 52                                   | 100.00%           | 0                                 | 0.00%             |
| <i>C. melo</i> var. <i>cantalupensis</i> | 50                                   | 96.15%            | 2                                 | 3.84%             |
| <i>C. melo</i> subsp. <i>melo</i> 56     | 5                                    | 9.61%             | 49                                | 94.23%            |
| <i>C. melo</i> subsp. <i>melo</i> 54     | 51                                   | 98.07%            | 6                                 | 11.53%            |
